# Supplementary material
Source: PubMed Central journal article supplement (PMC7854353)
Supplement: mmc3.pdf [file mmc3.pdf]

# Novel Genetic and Epigenetic Biomarkers of Prognostic and Predictive Significance in Stage II/III Colorectal Cancer

Xiao-Jing Luo,<sup>1,2</sup> Qi Zhao,<sup>1,2</sup> Jia Liu,<sup>1,2</sup> Jia-Bo Zheng,<sup>1</sup> Miao-Zhen Qiu,<sup>1</sup> Huai-Qiang Ju,<sup>1</sup> and Rui-Hua Xu<sup>1</sup>

<sup>1</sup>State Key Laboratory of Oncology in South China, Collaborative Innovation Center for Cancer Medicine, Sun Yat-sen University Cancer Center, Guangzhou 510060, P.R. China

**The therapeutic strategies of stage II/III colorectal cancer (CRC) patients after curative surgery remain controversial. In the clinical decision-making process, oncologists need to answer questions such as whether adjuvant chemotherapy is necessary or which therapeutic regimen should be given to each patient. At present, whether adjuvant chemotherapy should be applied is primarily based on histopathological features and clinical risk factors. However, only a fraction of patients can benefit from it. More rigorous stratifying biomarkers are urgently needed to help further distinguishing these populations of patients. Recent progress in next-generation sequencing and high-throughput technologies has greatly promoted biomarker discovery as well as our understanding of the underlying mechanisms in CRC. Novel genetic and epigenetic biomarkers that are associated with prognosis or therapeutic responses have emerged. In this review, we discuss the strategies of biomarker discovery and summarize the status and assess the utility of previously published biomarkers in CRC.**

Colorectal cancer (CRC) was estimated to be the fourth most frequently diagnosed cancer and the second most common cause of cancer deaths worldwide in 2018.<sup>1</sup> CRC has been recognized as a disease affecting mostly developed countries. However, in recent years, the incidence of CRC has kept increasing in developing countries, such as China, possibly due to changes in lifestyle and nutritional habits.<sup>2</sup> Early-stage CRC is mostly asymptomatic, and many patients are diagnosed at advanced stages.<sup>3</sup>

The tumor-node-metastasis (TNM) stage remains the most potent prognostic factor in the clinical decision-making process. Based on current guidelines, most stage II CRC patients are treated surgically without adjuvant chemotherapy. However, almost 15% of these patients undergo tumor recurrence and death caused by disease progression.<sup>4,5</sup> Whether a stage II CRC patient should receive adjuvant chemotherapy after surgery largely depends on the recurrence risk assessed by a group of clinical factors.<sup>6,7</sup> Still, a considerable proportion of stage II patients who are evaluated as low-risk patients later suffer from recurrence and progression. Stage III patients routinely receive adjuvant chemotherapy after surgery.<sup>8</sup> However, evidence showed these patients did not respond equally.<sup>9–12</sup> Therefore, the need for

biomarkers to more precisely identify stage II/III CRC patients that are suitable for adjuvant chemotherapy is highlighted.

The biomarkers that doctors use to predict CRC patients' prognosis and therapeutic response at present, such as carcinoembryonic antigen (CEA) and carbohydrate antigen 19-9 (CA19-9),<sup>13,14</sup> have relatively low sensitivity and specificity.<sup>15,16</sup> In this case, more meticulous biomarkers are needed. Thanks to the development of genomic high-throughput screening technologies, including next-generation sequencing and microarray analysis, a large number of molecular biomarkers and signatures with potential clinical prognostic and predictive values have been discovered via comprehensive association and bioinformatics analyses. Notably, several genomic-based biomarkers, such as the mismatch repair (MMR) or microsatellite instability (MSI) status, which plays a role as a predictive marker for adjuvant chemotherapy in patients with stage II CRC, have already entered into clinical practice and been validated.<sup>17–20</sup>

In this review, we summarize novel genomic and transcriptomic biomarkers as well as signatures reported recently with prognostic and predictive potentials in stage II/III CRC. We broadly examined current studies, focusing mainly on transcriptomic markers and signatures, which include newly discovered molecules such as microRNAs (miRNAs), long noncoding RNA (lncRNAs), and circular RNAs (circRNAs). We also assessed the clinical effectiveness of those already revealed and discussed their potential applications. The purpose of this review is to highlight some of the new candidate prognostic and predictive molecular markers for stage II/III CRC and assess their clinical utility for possible future applications.

## Biomarker Discovering Strategies

Currently, two major strategies are adopted by researchers to discover new molecular biomarkers: mechanism-based strategies and

<https://doi.org/10.1016/j.ymthe.2020.12.017>

<sup>2</sup>These authors contributed equally

**Correspondence:** Rui-Hua Xu, State Key Laboratory of Oncology in South China, Collaborative Innovation Center for Cancer Medicine, Sun Yat-sen University Cancer Center, 651 Dongfeng East Road, Guangzhou 510060, P.R. China.

**E-mail:** [xurh@susucc.org.cn](mailto:xurh@susucc.org.cn)

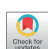

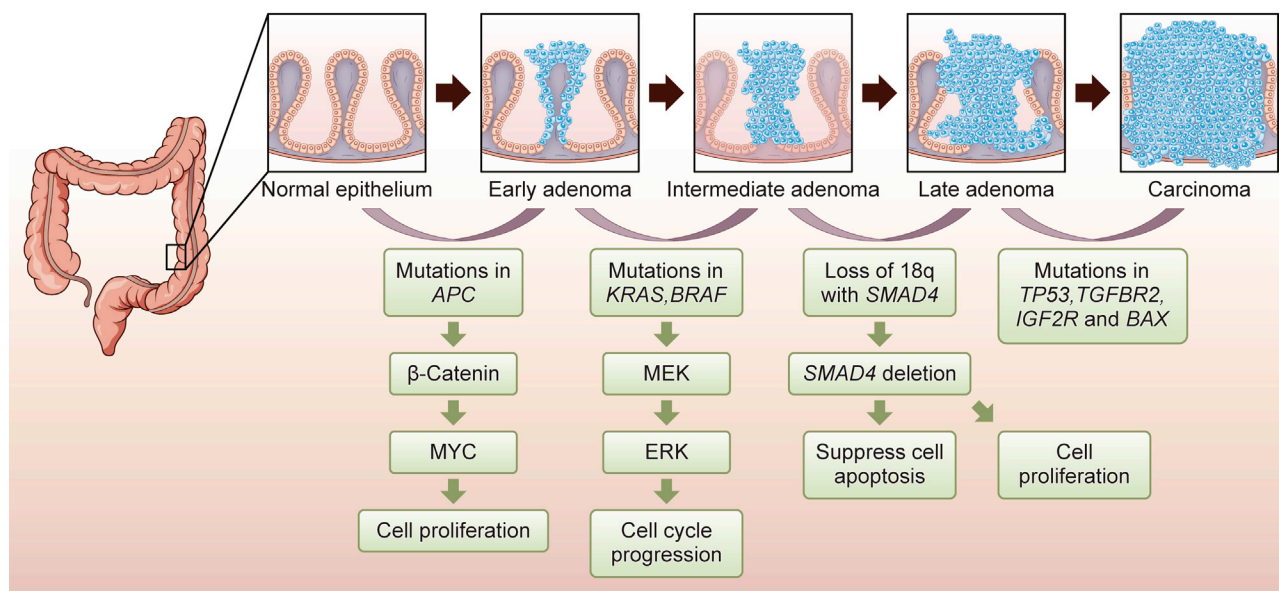

**Figure 1. Sequential Progression Model in Colorectal Cancer**

This is an oversimplified model describing the tumor progression sequence of CRC from adenoma to carcinoma. The development of CRC is a stepwise accumulation of genetic and epigenetic events, which align with clinical pathological changes.<sup>24,27</sup> The loss of *APC*, gatekeeping gene of CRC tumorigenesis, leads to small adenoma formation. Next, mutations in *KRAS* promote larger adenomas and gradually early carcinomas. The loss of *SMAD4* and mutations in *TP53* as well as *PIK3CA* are acquired later in carcinoma. These serial alterations in genes that regulate cellular differentiation, proliferation, and apoptosis pathways give rise to CRC carcinogenesis.<sup>28</sup>

unbiased high-throughput screening. In the first scenario, a biomarker study often begins with candidate genes that play essential roles in tumorigenesis and cancer development with already defined molecular mechanisms that have been fully investigated both *in vitro* and *in vivo*. These genes are usually hallmark genes in biological processes such as the cell cycle, apoptosis, and drug metabolism.<sup>21–23</sup> In the case of CRC, Vogelstein et al.<sup>24</sup> proposed a model describing the sequential progression from adenoma to carcinoma process (Figure 1). Biomarkers developed by mechanism-based strategies include Kirsten rat sarcoma viral oncogene (*KRAS*), adenomatous polyposis coli (*APC*), and tumor protein p53 (*TP53*) that can be traced back to Vogelstein's model.<sup>25,26</sup> Investigators first group patients by clinical parameters (e.g., responders versus non-responders to fluorouracil-based chemotherapy), then they compare the expression levels of the candidate genes between groups and evaluate the power of these genes in distinguishing patients' grouping status. However, only discrete genes with well-known roles, but not new molecules, can be investigated and developed as biomarkers using this hypothesis-driven, mechanism-based strategy. Furthermore, this strategy might lead to unilateral conclusions considering the heterogeneity of CRC.

While target-based approaches can search only a small part of the genome, unbiased high-throughput profiling has opened new avenues for marker discovery by screening the whole genome. For example, whole-transcriptome expression can be profiled comprehensively by high-throughput technologies such as transcriptomic assays and

RNA sequencing. Moreover, by the use of modified library construction or capture probes, as well as other bioinformatics analysis strategies, the technology can help develop novel RNA biomarkers such as miRNAs,<sup>29</sup> lncRNAs,<sup>30</sup> and circRNAs.<sup>31</sup> Specifically, CRC can be better characterized by transcriptomic subtypes that encompass not only information within the tumor but also stromal and immune components.<sup>32</sup> Genomic and bioinformatics technologies have yielded many potential biomarkers and related signatures, which may prove useful with prognostic and predictive values. Data acquired from high-throughput technologies such as microarrays are usually enormous and disordered. Researchers use hierarchical clustering analysis to examine these data.<sup>33</sup> Hierarchical clustering analysis is considered an unsupervised clustering method that is suitable for an exploratory analysis to determine how microarray groups cluster together according to similar features without taking experimental variables into account. Patients are sorted according to similarities in their gene expression profiles to predict different clinical outcomes.

#### Genomic Biomarkers

Genomic instability and oncogene mutations, tumor suppressor gene mutations, and mismatch repair genes can serve as biomarkers. Here, we summarize a few clinically approved genomic biomarkers in stage II/III CRC.

#### Chromosomal Instability (CIN) and MSI

CIN and MSI are two types of genomic instabilities. CIN refers to the increased rate of chromosomal gain and loss that leads to numerical

**Table 1. Characteristics of Different RNA Molecules as CRC Biomarkers**

| Molecule            | mRNA            | miRNA                                    | lncRNA                                   | circRNA |
|---------------------|-----------------|------------------------------------------|------------------------------------------|---------|
| Abundance           | high            | Low                                      | low                                      | low     |
| Stability           | +               | ++                                       | +                                        | +++     |
| Detection method    | qPCR sequencing | microarray (array-CGH), sequencing, qPCR | microarray (array-CGH), sequencing, qPCR | qPCR    |
| Supporting evidence | weak            | strong                                   | intermediate                             | weak    |

CGH, comparative genomic hybridization.

or structural chromosome aberrations. MSI is defined as tumors having a defective DNA mismatch repair system due to the inactivation of either one of the following genes as the dominant genomic feature: mutL homolog 1 (*MLH1*), *MLH3*, mutS homolog 2 (*MSH2*), *MSH3*, *MSH6*, or PMS1 homolog 2 (*PMS2*).<sup>26,34,35</sup> CIN is more commonly presented in CRC than MSI.<sup>36</sup> The prognostic value of both CIN and MSI has been validated in a large meta-analysis.<sup>37,38</sup> Patients with CIN disease have a worse prognosis than those without CIN. In addition, MSI-high (MSI-H) patients have a better prognosis than microsatellite stable (MSS) patients in stage II CRCs<sup>39</sup> and maintain their survival advantages in the presence of 5-fluorouracil (5-FU) treatment;<sup>40</sup> however, MSI has no prognostic value in stage III CRCs.<sup>41</sup>

### CpG Island Methylation Phenotype (CIMP)

Aberrant DNA methylation is the most broadly studied epigenetic alteration in cancer. The CIMP was first described in CRC in 1999 by Toyota et al.<sup>42</sup> It was characterized as a cluster of exceptionally hypermethylated CpG dinucleotides. Weisenberger et al.<sup>43</sup> later defined CIMP in CRC based on the methylation status of five genes: calcium channel voltage dependent alpha 1G (*CACNA1G*), insulin-like growth factor 2 (*IGF2*), neurogenin 1 (*NEUROG1*), RUNX family transcription factor 3 (*RUNX3*), and suppressor of cytokine signaling (*SOCS*). Multiple, extensive clinical studies have demonstrated that specific methylated DNA signatures could be developed as prognostic and predictive biomarkers in CRC. Several independent studies reported that CIMP-positive cancers were correlated with an unfavorable prognosis, including a cohort of more than 600 MSS CRC patients by Lee et al.<sup>44</sup> and a cohort of 206 stage III CRC patients by van Rijnsoever et al.<sup>45</sup> This conclusion was validated later in two other cohorts of stage II/III patients.<sup>46,47</sup> However, the opinions differ: some studies have suggested that the prognosis of CIMP-positive CRC patients depends on the MSI status of the tumor,<sup>48,49</sup> while other studies have suggested that the poor prognosis of CIMP-positive CRCs was from coexisting B-Raf proto-oncogene (*BRAF*) V600E mutations.<sup>44,50–52</sup> These contrary findings may be due to the heterogeneity of patient cohorts or the different CIMP criteria used in different studies. However, the CIMP status is still promising and can be further investigated as a prognostic factor.

### KRAS and BRAF

The *KRAS* proto-oncogene encodes a small GTPase that affects cell proliferation and differentiation.<sup>53</sup> *KRAS* mutations in codons 12, 13, and 61 impair the GTPase activity of the encoded protein, which leads to the consistent activation of *RAS/RAF* signaling.<sup>54</sup> *KRAS* mutations occur at the early stage of CRC, accounting for one-third of all cases, and a large majority of the mutations are located in codon 12 (approximately 80%), followed by codon 13.<sup>55</sup> Many studies have evaluated *KRAS* as a prognostic biomarker based on its association with CRC outcomes.<sup>50,55–58</sup> The RASCAL study, a large meta-analysis, found that the glycine to valine substitution in codon 12 of *KRAS* was associated with a poor prognosis in stage III CRC patients.<sup>56</sup> However, several other large studies found no association.<sup>50,57,58</sup> In stage II CRC, no prognostic significance was found of the *KRAS* mutation type.<sup>59</sup> *BRAF* is the downstream target of *KRAS*. Mutations in *KRAS* and *BRAF* seem to be mutually exclusive.<sup>60,61</sup> *BRAF* mutation was considered a prognosticator for poor survival in stage II/III CRC patients receiving adjuvant chemotherapy.<sup>62</sup> The most famous *BRAF* V600E mutation was also reported to confer a worse prognosis in stage II/III CRC patients.<sup>63</sup>

### Transcriptomic Biomarkers

More than 90% of the human genome is actively transcribed, but only less than 2% encodes protein-coding genes that produce translational messenger RNA (mRNA) transcripts, while most of these transcripts are noncoding RNAs (ncRNAs).<sup>64</sup> As protein-coding mRNAs have a short half-life and their expression changes enormously according to the physiological status, they are not an ideal prognosticator. Only a few studies have applied mRNA levels as biomarkers. For example, Takahashi et al.<sup>65</sup> demonstrated that high never in mitosis A (NIMA)-related kinase 2 (*NEK2*) mRNA levels were associated with a poor prognosis in 180 CRC patients.

ncRNAs have more advantages than translational mRNAs and thus can be developed into biomarkers based on their various types and remarkable stability. The characteristics of different types of RNA molecules and their potential as biomarkers are summarized in Table 1. In addition to the well-established types, such as transfer RNAs (tRNAs) and ribosomal RNAs (rRNAs), ncRNAs also comprise many recently identified novel transcripts, including miRNAs, circRNAs, small nucleolar RNAs (snoRNAs), PIWI interaction RNAs (piRNAs), and lncRNAs. Many studies have suggested that ncRNAs play important roles in various biological processes, such as the cell cycle, proliferation, migration, and apoptosis.<sup>66</sup> Several investigators have observed altered ncRNA expression patterns in human diseases, including CRC. ncRNA alterations can act as biomarkers to predict patient outcomes. Their potential is enormous. Compared to genomic markers, transcriptomic biomarkers are mostly quantitative markers rather than markers of a discrete gene status. Thus, the disease status can be better characterized by a continuous change than by a positive-negative index. This discovery is attributed to the rapid development of unbiased high-throughput screening methods. Quantitative real-time PCR is generally considered the “gold standard” method used to measure target RNA expression. It facilitates the possible clinical

application of transcriptomic biomarkers. Here, we summarize the studies that identified ncRNA biomarkers with clinical prognostic and predictive values using various patient cohorts with different clinical characteristics.

### miRNAs

miRNAs mediate mRNA degradation and the inhibition of mRNA translation.<sup>67–69</sup> Croce and colleagues<sup>70</sup> first described the role of miRNAs in cancer in 2002. They found that the expression of miR-15 and miR-16 was decreased in patients with chronic lymphocytic leukemia. Since then, hundreds and thousands of miRNAs have been reported to be dysregulated in various human malignant diseases, including CRC, with a regulatory role in the expression of important oncogenes and tumor suppressor genes.<sup>71</sup> miRNAs are involved in multiple pathways that are important in CRC development, including the TP53, Wnt/ $\beta$ -catenin, RAS/mitogen-activated protein kinase (MAPK), and phosphatidylinositol 3-kinase (PI3K)/AKT signaling pathways.<sup>72–75</sup> They also play important roles in regulating drug resistance.<sup>76–78</sup> However, most of these results are based on *in vitro* studies and remain to be assessed in clinical sample sets.

miRNA biomarker studies in human cancer have emerged in large numbers during the past decade. The underlying reasons for this increasing interest are based on some of their unique characteristics. First, miRNAs are tolerant to RNase-mediated degradation because of their short length and hairpin-loop structure,<sup>79</sup> enabling extraction from a number of clinical specimens, including formalin-fixed, paraffin embedded (FFPE) tissues and various kinds of body fluids, including blood, saliva, urine, and feces. Second, miRNA stability is remarkable under a variety of laboratory conditions. Cell-free miRNAs are often contained in high-density lipoprotein particles, apoptotic bodies, microvesicles, and exosomes<sup>80–83</sup> and are thus protected from degradation. In addition, their binding to argonaute-2 (Ago-2) also increases their stability.<sup>80</sup> Third, cancer cells can secrete miRNAs into the blood and digestive tract.<sup>84,85</sup> Therefore, the stability of miRNAs and their extensive presence in the body (e.g., blood, feces, cancer cells, cells near the cancer) have made miRNAs promising candidates for prognostic and predictive biomarkers; thus, miRNAs have been widely investigated.

Schetter et al.<sup>86</sup> evaluated the expression levels of 389 miRNAs in 84 CRC patients and matched normal tissues by a microarray-based approach and validated the results by quantitative PCR. They found that high miR-21 expression was associated with poor survival in CRC patients. They also discovered that miR-21 overexpression was associated with a poor response to 5-FU-based adjuvant chemotherapy. Several other studies confirmed their conclusions independently. miR-21 has been proposed as both a prognostic and predictive marker for CRC.<sup>87</sup> Furthermore, Hur et al.<sup>88</sup> and Toiyama et al.<sup>89</sup> found that miR-200c was elevated in CRC, and they conducted a three-phase study using 446 colorectal specimens from both the serum and primary tumor from stage II and III CRC patients. They found that high serum miR-200c expression levels indicated lymph node metastasis and a poor prognosis. The let-7 family has also

been broadly studied in the tumorigenesis of CRC. Members of this family were identified as tumor-suppressive miRNAs and downregulated in CRC tumor tissues.<sup>90,91</sup> Nakajima et al.<sup>92</sup> proposed that let-7g and miR-181b could act as indicators for the response to 5-FU-based adjuvant chemotherapy in CRC patients. In addition, many dysregulated miRNAs have been proposed as prognostic and predictive CRC markers by different researchers, as shown in Table S1.

### lncRNAs

A lncRNA is another type of single-stranded ncRNA transcript that consists of more than 200 nt.<sup>93</sup> Only a few lncRNAs, such as H19 and Xist, were characterized in the pregenomic era. However, since the early 2000s, the elucidation of the human genome and transcriptome has led to an increasing number of studies on lncRNAs. Thousands of lncRNAs have been identified in the human genome, and this number continues to grow.<sup>94,95</sup> lncRNAs are the second most commonly studied ncRNA, following miRNAs. Many studies have suggested that lncRNAs are involved in multiple processes of cancer biology.<sup>96</sup> These studies have shown that lncRNAs function through a variety of regulatory mechanisms, including translational activation or inhibition, mRNA degradation, acting as RNA decoys or miRNA sponges, recruiting chromatin modifiers as scaffolds, and in the regulation of protein activity or stability.<sup>97</sup>

A growing body of literature indicates that the dysregulated expression of lncRNAs may be functional in human malignancies, including CRC, with clinical implications. For instance, HOX antisense intergenic RNA (*HOTAIR*) is reported to be an oncogenic lncRNA. *HOTAIR* cooperates with polycomb repressive complex 2 (PRC2) to reprogram chromatin organization and promote metastasis in breast cancer.<sup>98</sup> Kogo et al.<sup>99</sup> first demonstrated in CRC that high *HOTAIR* expression was associated with distant metastasis and a poor prognosis. Their finding was later validated by two other groups.<sup>100,101</sup> Li et al.<sup>102</sup> also discovered that a high expression level of *HOTAIR* was associated with a poor response to 5-FU-based treatment and predicted poor overall survival (OS) and recurrence-free survival (RFS) in CRC patients who received 5-FU-based chemotherapy. *HOTAIR* can be established as a both prognostic and predictive marker in CRC.

Another lncRNA, colorectal neoplasia differentially expressed (*CRNDE*), is overexpressed in a variety of cancers, including CRC.<sup>103</sup> Several independent studies conducted by different groups of researchers reached the same conclusion: high *CRNDE* expression is associated with a poor prognosis in CRC patients.<sup>104,105</sup> Metastasis-associated lung adenocarcinoma transcript 1 (*MALAT1*) was originally identified as a metastasis predictor in non-small cell lung cancer patients.<sup>106</sup> Later, Zheng et al.<sup>107</sup> found *MALAT1* to be prognostic in CRC patients. In addition, several other lncRNAs were found to be prognostic in CRC, as shown in Table S2. lncRNAs have been detected in extracellular vesicles,<sup>108,109</sup> and some of these studies successfully detected and measured certain lncRNA levels in the serum or plasma,<sup>30,110</sup> indicating the potential of lncRNAs to serve as minimally invasive biomarkers in CRC.



### **circRNAs**

circRNAs, with lengths of hundreds to thousands of nucleotides, are a group of naturally occurring endogenous ncRNAs.<sup>111</sup> circRNAs were first discovered in 1976 in viroids of RNA viruses as single-stranded covalently closed circRNA molecules.<sup>112</sup> Since then, circRNAs have been broadly found in different species, including humans.<sup>113</sup> The development of next-generation sequencing techniques and bioinformatics has allowed researchers to further investigate the functions and mechanisms of circRNAs.

Currently, circRNAs are much less studied than miRNAs and lncRNAs, with their functions remaining mostly unknown. A few circRNAs have been reported to be functional in CRC and may act as potential prognostic biomarkers. For example, the circRNA ciRS-7, one of the most studied circRNAs, is a miR-7 sponge that results in reduced miR-7 activity and increased levels of miR-7 targets.<sup>114,115</sup> miR-7 is considered a tumor suppressor in CRC, and it negatively controls the expression of several oncogenes.<sup>115</sup> Impairing miR-7 activity would have an important impact on the cell phenotype. Weng et al.<sup>116</sup> reported that ciRS-7 was overexpressed in CRC cancerous tissue and that high ciRS-7 expression indicated a poor patient prognosis. They performed a multivariate survival analysis in both training and validation cohorts and found that ciRS-7 expression was an independent risk factor for OS. A similar case was reported by Zeng et al.,<sup>117</sup> which indicated that circHIPK3 also acts as a miR-7 sponge, and that a high expression level of circHIPK3 is an independent prognostic factor of poor OS in CRC patients. The most reported mechanism of circRNAs is acting as miRNA sponges. They may also encode proteins with biological functions.<sup>118</sup> It has been reported that circRNAs can be transferred to exosomes and secreted into the circulatory system as well as other body fluids, indicating the possibility of circRNAs acting as noninvasive biomarkers.<sup>119</sup> However, investigations on circRNAs are mostly *in vitro* studies and lack validation in clinical specimens and patient cohorts, and the potential for prognostic biomarker discovery in circRNAs has yet to be exploited.

### **Transcriptomic Signatures**

In addition to individual markers, gene panels comprised of ncRNAs have been developed to identify high-risk CRC patients. Specific expression patterns of several genes may yield higher power in distinguishing patients with different prognosis than a single gene. Signatures have higher sensitivity and specificity than do single gene biomarkers. CRC is not a one-gene show, as hundreds if not thousands of genes have been effective during the genesis and progression of the disease. It is too complicated to be simply represented by the status of one single gene. Using signatures as biomarkers, we generate scores that could more accurately represent the disease status, which allows clinicians to stratify patients more meticulously into groups, instead of just two groups depending on the positive/negative status of one gene.

Zhang et al.<sup>29</sup> examined the expression of 1,849 miRNAs in 40 paired stage II colon tumors and adjacent normal mucosa tissues

using miRNA microarrays and found 35 differentially expressed miRNAs. They subsequently built a miRNA-based classifier comprising six miRNAs (miR-20a-5p, miR-21-5p, miR-103a-3p, miR-106a-5p, miR-143-5p, and miR-215) in a testing cohort of 138 patients and an independent validation cohort of 460 patients. The six-miRNA signature was able to identify stage II CRC patients with a high risk of recurrence. We recently developed a four-circRNA-based risk score (cirScore) (i.e., hsa\_circ\_0122319, hsa\_circ\_0087391, hsa\_circ\_0079480, and hsa\_circ\_0008039) to predict postoperative recurrence in stage II/III colon cancer patients using a cohort of 667 patients. Patients with high cirScores had shorter DFS and OS than did patients with low cirScores in the training cohort of 249 patients. The prognostic capacity of the classifier was validated in internal and external cohorts of 122 and 180 patients, respectively.<sup>31</sup>

Several other studies also developed different classifiers for patient stratification, including miRNA signatures, lncRNA signatures, and signatures comprised of both miRNAs and lncRNAs. However, there were more or less inherent differences in the patient characteristics of the cohorts; details are shown in [Table S3](#).

### **CONCLUSIONS**

Currently, the TNM stage and histopathological and clinical risk factors remain the most commonly applied risk factors in the clinical decision-making process. However, the recurrent risk assessment system of patients with stage II CRC needs further improvement to optimize the treatment strategy. Also, all stage III patients are unreasonably given adjuvant chemotherapy after curative surgery indistinguishably. With more accurate biomarkers, clinicians could better identify stage II patients who are more likely to go through recurrence and also spare those stage III patients who would not benefit from chemotherapy from the toxicities. Novel types of biomarkers are arising. Molecular-based biomarkers, such as genetic markers, epigenetic markers, and their signatures, enable physicians to more precisely stratify patients for personalized treatment. In addition, new methods of biomarker detection are also developing rapidly, such as liquid biopsy, which is minimally invasive and characterized by the isolating cancer-derived components from peripheral blood or other body fluids.<sup>120</sup> However, there are still issues remaining to be addressed before broad clinical application, such as the low amounts of circulating tumor cells or circulating tumor DNA or other molecules derived from the tumor.<sup>120</sup> However, it is reasonable to think that the liquid biopsy could play an important role in predicting relapses and monitoring metastases and treatment responses in CRC in the foreseeable future. Additionally, liquid biopsy could provide real-time genetic information of the tumor, which can help physicians better tailor the treatment to each patient.<sup>121</sup> Yet, with the discovery of novel biomarkers and ongoing development of detection methods, the application of biomarker-guided treatment for patients with CRC remains limited. CRC therapies are becoming increasingly target specific. In the era of personalized treatment, biomarkers will inevitably develop in tandem to play greater roles in predicting the prognosis and treatment response of CRC patients.

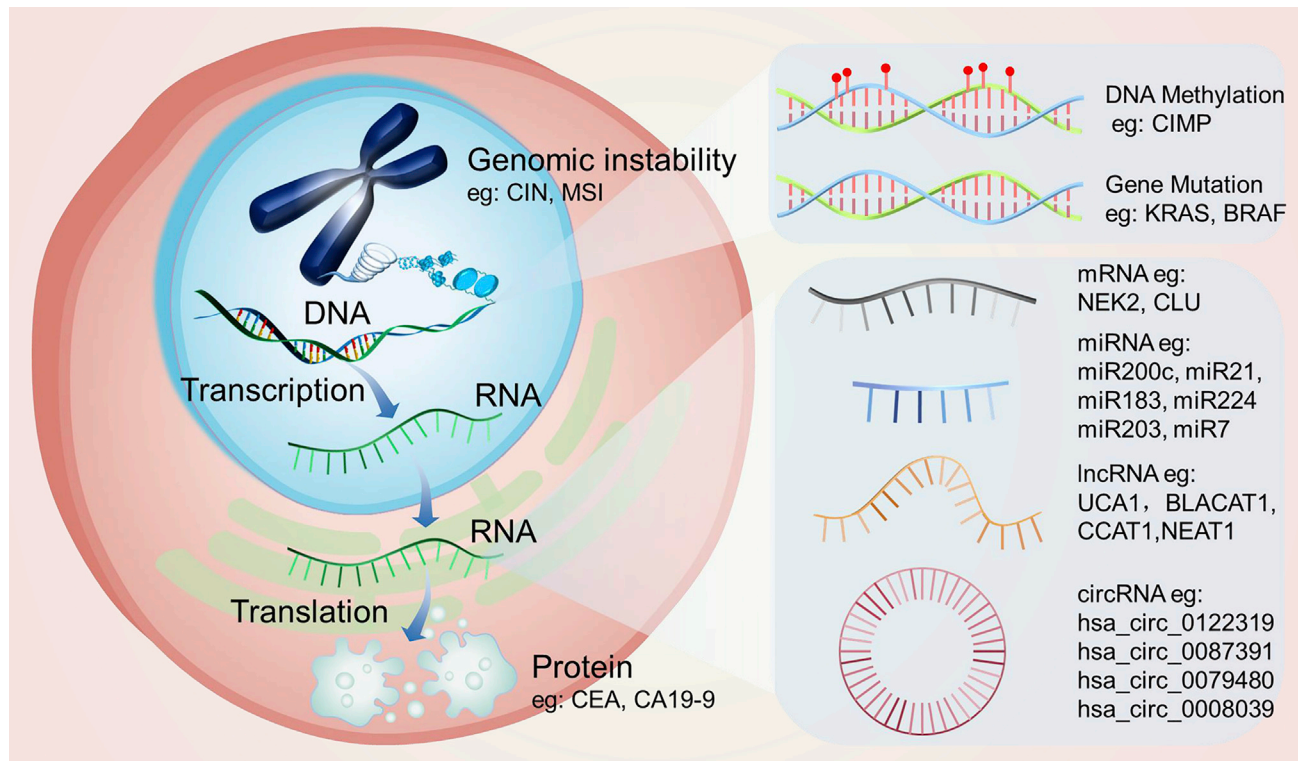

**Figure 2. Different Categories of Prognostic and Predictive CRC Biomarkers in Bimolecular Level**

Different categories in the bimolecular level of CRC biomarkers with potential prognostic and predictive values, which include genomic and transcriptomic aspects mainly, are summarized. Also, representative candidate genes that are currently under research subordinate to each category are enumerated.

Advances in high-throughput technology and bioinformatics have opened a gate for understanding the genetic and epigenetic alterations in CRC. In the last two decades, epigenetic alterations have become a burgeoning research hotspot for biomarker discovery. Epigenetic biomarkers, including methylated DNAs, miRNAs, lncRNAs, and circRNAs, for CRC prognosis and treatment response have emerged in large numbers (Figure 2). However, few markers have been validated and integrated into clinical practice. Most established biomarkers have a low clinical prevalence. Currently, the only marker with sufficient evidence to justify its use in routine clinical applications is *KRAS* mutation and the selection for anti-epidermal growth factor receptor (EGFR) therapy.<sup>122</sup> Different sample types, small cohorts, algorithms with poor efficiency, as well as high heterogeneity of the individuals pose challenges for biomarker discovery and development. In this setting, large-scale comprehensive molecular profiling from translational studies combined with artificial intelligence may offer an intriguing opportunity to develop improved molecular biomarkers and prediction algorithms and efficacious therapeutic targets. The transfer of these new biomarkers and targets from bench to bedside also necessitates larger-scale and multicenter trials to confirm their advantages. The discovery of potential biomarkers is opening the way to a more individualized practice of CRC, although the practical problems are many and difficult. The next frontier for novel

molecular biomarkers is perhaps to answer the question of whether they might act as predictive and prognostic biomarkers for immunotherapy in CRC.

#### SUPPLEMENTAL INFORMATION

Supplemental Information can be found online at <https://doi.org/10.1016/j.ymthe.2020.12.017>.

#### ACKNOWLEDGMENTS

This work was supported by the National Natural Science Foundation of China (81930065 and 81871951), the Natural Science Foundation of Guangdong Province (2014A030312015), the Science and Technology Program of Guangdong (2019B020227002), and by the Science and Technology Program of Guangzhou (201904020046, 201803040019, and 201704020228).

#### DECLARATION OF INTERESTS

The authors declare no competing interests.

#### REFERENCES

1. Bray, F., Ferlay, J., Soerjomataram, I., Siegel, R.L., Torre, L.A., and Jemal, A. (2018). Global cancer statistics 2018: GLOBOCAN estimates of incidence and mortality worldwide for 36 cancers in 185 countries. *CA Cancer J. Clin.* 68, 394–424.

2. Chen, W., Zheng, R., Zeng, H., Zhang, S., and He, J. (2015). Annual report on status of cancer in China, 2011. *Chin. J. Cancer Res.* 27, 2–12.
3. Benitez-Majano, S., Fowler, H., Maringe, C., Di Girolamo, C., and Rachet, B. (2016). Deriving stage at diagnosis from multiple population-based sources: colorectal and lung cancer in England. *Br. J. Cancer* 115, 391–400.
4. Benson, A.B., 3rd, Schrag, D., Somerfield, M.R., Cohen, A.M., Figueredo, A.T., Flynn, P.J., Krzyzanowska, M.K., Maroun, J., McAllister, P., Van Cutsem, E., et al. (2004). American Society of Clinical Oncology recommendations on adjuvant chemotherapy for stage II colon cancer. *J. Clin. Oncol.* 22, 3408–3419.
5. Figueredo, A., Coombes, M.E., and Mukherjee, S. (2008). Adjuvant therapy for completely resected stage II colon cancer. *Cochrane Database Syst. Rev.* (3), CD005390.
6. Oñate-Ocaña, L.F., Montesdeoca, R., López-Graniel, C.M., Aiello-Crocifoglio, V., Mondragón-Sánchez, R., Cortina-Borja, M., Herrera-Goepfert, R., Oros-Ovalle, C., and Gallardo-Rincón, D. (2004). Identification of patients with high-risk lymph node-negative colorectal cancer and potential benefit from adjuvant chemotherapy. *Jpn. J. Clin. Oncol.* 34, 323–328.
7. O'Connor, E.S., Greenblatt, D.Y., LoConte, N.K., Gangnon, R.E., Liou, J.I., Heise, C.P., and Smith, M.A. (2011). Adjuvant chemotherapy for stage II colon cancer with poor prognostic features. *J. Clin. Oncol.* 29, 3381–3388.
8. Jonker, D.J., Spithoff, K., and Maroun, J.; Gastrointestinal Cancer Disease Site Group of Cancer Care Ontario's Program in Evidence-based Care (2011). Adjuvant systemic chemotherapy for stage II and III colon cancer after complete resection: an updated practice guideline. *Clin. Oncol. (R. Coll. Radiol.)* 23, 314–322.
9. Gray, R., Barnwell, J., McConkey, C., Hills, R.K., Williams, N.S., and Kerr, D.J.; Quasar Collaborative Group (2007). Adjuvant chemotherapy versus observation in patients with colorectal cancer: a randomised study. *Lancet* 370, 2020–2029.
10. Moertel, C.G., Fleming, T.R., Macdonald, J.S., Haller, D.G., Laurie, J.A., Tangen, C.M., Ungerleider, J.S., Emerson, W.A., Tormey, D.C., Glick, J.H., et al. (1995). Intergroup study of fluorouracil plus levamisole as adjuvant therapy for stage II/Dukes' B2 colon cancer. *J. Clin. Oncol.* 13, 2936–2943.
11. Schippinger, W., Samonigg, H., Schaberl-Moser, R., Greil, R., Thödtmann, R., Tschmelitsch, J., Jagoditsch, M., Steger, G.G., Jakesz, R., Herbst, F., et al.; Austrian Breast and Colorectal Cancer Study Group (2007). A prospective randomised phase III trial of adjuvant chemotherapy with 5-fluorouracil and leucovorin in patients with stage II colon cancer. *Br. J. Cancer* 97, 1021–1027.
12. Shiovitz, S., Bertagnolli, M.M., Renfro, L.A., Nam, E., Foster, N.R., Dzieciatkowski, S., Luo, Y., Lao, V.V., Monnat, R.J., Jr., Emond, M.J., et al.; Alliance for Clinical Trials in Oncology (2014). CpG island methylator phenotype is associated with response to adjuvant irinotecan-based therapy for stage III colon cancer. *Gastroenterology* 147, 637–645.
13. Sener, S.F., Imperato, J.P., Chmiel, J., Fremgen, A., and Sylvester, J. (1989). The use of cancer registry data to study preoperative carcinoembryonic antigen level as an indicator of survival in colorectal cancer. *CA Cancer J. Clin.* 39, 50–57.
14. Zhong, W., Yu, Z., Zhan, J., Yu, T., Lin, Y., Xia, Z.S., Yuan, Y.H., and Chen, Q.K. (2015). Association of serum levels of CEA, CA199, CA125, CYFRA21-1 and CA72-4 and disease characteristics in colorectal cancer. *Pathol. Oncol. Res.* 21, 83–95.
15. Sanders, D.S., and Kerr, M.A. (1999). Lewis blood group and CEA related antigens; coexpressed cell-cell adhesion molecules with roles in the biological progression and dissemination of tumours. *Mol. Pathol.* 52, 174–178.
16. Ritts, R.E., Jr., Del Villano, B.C., Go, V.L., Herberman, R.B., Klug, T.L., and Zurawski, V.R., Jr. (1984). Initial clinical evaluation of an immunoradiometric assay for CA 19-9 using the NCI serum bank. *Int. J. Cancer* 33, 339–345.
17. Hewish, M., Lord, C.J., Martin, S.A., Cunningham, D., and Ashworth, A. (2010). Mismatch repair deficient colorectal cancer in the era of personalized treatment. *Nat. Rev. Clin. Oncol.* 7, 197–208.
18. Sinicrope, F.A. (2010). DNA mismatch repair and adjuvant chemotherapy in sporadic colon cancer. *Nat. Rev. Clin. Oncol.* 7, 174–177.
19. Zaanani, A., Shi, Q., Taieb, J., Alberts, S.R., Meyers, J.P., Smyrk, T.C., Julie, C., Zawadi, A., Taberero, J., Mini, E., et al. (2018). Role of deficient DNA mismatch repair status in patients with stage III colon cancer treated with FOLFOX adjuvant chemotherapy: a pooled analysis from 2 randomized clinical trials. *JAMA Oncol.* 4, 379–383.
20. Vilar, E., and Gruber, S.B. (2010). Microsatellite instability in colorectal cancer—the stable evidence. *Nat. Rev. Clin. Oncol.* 7, 153–162.
21. Singh, A., Sweeney, M.F., Yu, M., Burger, A., Greninger, P., Benes, C., Haber, D.A., and Settleman, J. (2012). TAK1 inhibition promotes apoptosis in KRAS-dependent colon cancers. *Cell* 148, 639–650.
22. Whitfield, M.L., George, L.K., Grant, G.D., and Perou, C.M. (2006). Common markers of proliferation. *Nat. Rev. Cancer* 6, 99–106.
23. Popat, S., Matakidou, A., and Houlston, R.S. (2004). Thymidylate synthase expression and prognosis in colorectal cancer: a systematic review and meta-analysis. *J. Clin. Oncol.* 22, 529–536.
24. Vogelstein, B., Fearon, E.R., Hamilton, S.R., Kern, S.E., Preisinger, A.C., Leppert, M., Nakamura, Y., White, R., Smits, A.M., and Bos, J.L. (1988). Genetic alterations during colorectal-tumor development. *N. Engl. J. Med.* 319, 525–532.
25. Wang, M.T., Holderfield, M., Galeas, J., Delrosario, R., To, M.D., Balmann, A., and McCormick, F. (2015). K-Ras promotes tumorigenicity through suppression of non-canonical Wnt signaling. *Cell* 163, 1237–1251.
26. Cancer Genome Atlas Network (2012). Comprehensive molecular characterization of human colon and rectal cancer. *Nature* 487, 330–337.
27. Fearon, E.R., and Vogelstein, B. (1990). A genetic model for colorectal tumorigenesis. *Cell* 61, 759–767.
28. Vogelstein, B., Papadopoulos, N., Velculescu, V.E., Zhou, S., Diaz, L.A., Jr., and Kinzler, K.W. (2013). Cancer genome landscapes. *Science* 339, 1546–1558.
29. Zhang, J.X., Song, W., Chen, Z.H., Wei, J.H., Liao, Y.J., Lei, J., Hu, M., Chen, G.Z., Liao, B., Lu, J., et al. (2013). Prognostic and predictive value of a microRNA signature in stage II colon cancer: a microRNA expression analysis. *Lancet Oncol.* 14, 1295–1306.
30. Wang, R., Du, L., Yang, X., Jiang, X., Duan, W., Yan, S., Xie, Y., Zhu, Y., Wang, Q., Wang, L., et al. (2016). Identification of long noncoding RNAs as potential novel diagnosis and prognosis biomarkers in colorectal cancer. *J. Cancer Res. Clin. Oncol.* 142, 2291–2301.
31. Ju, H.Q., Zhao, Q., Wang, F., Lan, P., Wang, Z., Zuo, Z.X., Wu, Q.N., Fan, X.J., Mo, H.Y., Chen, L., et al. (2019). A circRNA signature predicts postoperative recurrence in stage II/III colon cancer. *EMBO Mol. Med.* 11, e10168.
32. Dienstmann, R., Vermeulen, L., Guinney, J., Kopetz, S., Tejpar, S., and Taberero, J. (2017). Consensus molecular subtypes and the evolution of precision medicine in colorectal cancer. *Nat. Rev. Cancer* 17, 79–92.
33. Oh, S.C., Park, Y.Y., Park, E.S., Lim, J.Y., Kim, S.M., Kim, S.B., Kim, J., Kim, S.C., Chu, I.S., Smith, J.J., et al. (2012). Prognostic gene expression signature associated with two molecularly distinct subtypes of colorectal cancer. *Gut* 61, 1291–1298.
34. Grady, W.M., and Carethers, J.M. (2008). Genomic and epigenetic instability in colorectal cancer pathogenesis. *Gastroenterology* 135, 1079–1099.
35. Boland, C.R., and Goel, A. (2010). Microsatellite instability in colorectal cancer. *Gastroenterology* 138, 2073–2087.e3.
36. Boland, C.R., Thibodeau, S.N., Hamilton, S.R., Sidransky, D., Eshleman, J.R., Burt, R.W., Meltzer, S.J., Rodriguez-Bigas, M.A., Fodde, R., Ranzani, G.N., and Srivastava, S. (1998). A National Cancer Institute Workshop on Microsatellite Instability for cancer detection and familial predisposition: development of international criteria for the determination of microsatellite instability in colorectal cancer. *Cancer Res.* 58, 5248–5257.
37. Walther, A., Houlston, R., and Tomlinson, I. (2008). Association between chromosomal instability and prognosis in colorectal cancer: a meta-analysis. *Gut* 57, 941–950.
38. Popat, S., Hubner, R., and Houlston, R.S. (2005). Systematic review of microsatellite instability and colorectal cancer prognosis. *J. Clin. Oncol.* 23, 609–618.
39. Petrelli, F., Ghidini, M., Cabiddu, M., Pezzica, E., Corti, D., Turati, L., Costanzo, A., Varricchio, A., Ghidini, A., Barni, S., and Tomasello, G. (2019). Microsatellite instability and survival in stage II colorectal cancer: a systematic review and meta-analysis. *Anticancer Res.* 39, 6431–6441.



## Review

40. Klingbiel, D., Saridaki, Z., Roth, A.D., Bosman, F.T., Delorenzi, M., and Tejpar, S. (2015). Prognosis of stage II and III colon cancer treated with adjuvant 5-fluorouracil or FOLFIRI in relation to microsatellite status: results of the PETACC-3 trial. *Ann. Oncol.* 26, 126–132.
41. Wang, B., Li, F., Zhou, X., Ma, Y., and Fu, W. (2019). Is microsatellite instability-high really a favorable prognostic factor for advanced colorectal cancer? A meta-analysis. *World J. Surg. Oncol.* 17, 169.
42. Toyota, M., Ahuja, N., Ohe-Toyota, M., Herman, J.G., Baylin, S.B., and Issa, J.P. (1999). CpG island methylator phenotype in colorectal cancer. *Proc. Natl. Acad. Sci. USA* 96, 8681–8686.
43. Weisenberger, D.J., Siegmund, K.D., Campan, M., Young, J., Long, T.I., Faasse, M.A., Kang, G.H., Widschwendter, M., Weener, D., Buchanan, D., et al. (2006). CpG island methylator phenotype underlies sporadic microsatellite instability and is tightly associated with *BRAF* mutation in colorectal cancer. *Nat. Genet.* 38, 787–793.
44. Lee, S., Cho, N.Y., Choi, M., Yoo, E.J., Kim, J.H., and Kang, G.H. (2008). Clinicopathological features of CpG island methylator phenotype-positive colorectal cancer and its adverse prognosis in relation to *KRAS/BRAF* mutation. *Pathol. Int.* 58, 104–113.
45. Van Rijnsoever, M., Elsaleh, H., Joseph, D., McCaul, K., and Iacopetta, B. (2003). CpG island methylator phenotype is an independent predictor of survival benefit from 5-fluorouracil in stage III colorectal cancer. *Clin. Cancer Res.* 9, 2898–2903.
46. Tan, I.B., Ivanova, T., Lim, K.H., Ong, C.W., Deng, N., Lee, J., Tan, S.H., Wu, J., Lee, M.H., Ooi, C.H., et al. (2011). Intrinsic subtypes of gastric cancer, based on gene expression pattern, predict survival and respond differently to chemotherapy. *Gastroenterology* 141, 476–485, 485.e1–11.
47. Min, B.H., Bae, J.M., Lee, E.J., Yu, H.S., Kim, Y.H., Chang, D.K., Kim, H.C., Park, C.K., Lee, S.H., Kim, K.M., and Kang, G.H. (2011). The CpG island methylator phenotype may confer a survival benefit in patients with stage II or III colorectal carcinomas receiving fluoropyrimidine-based adjuvant chemotherapy. *BMC Cancer* 11, 344.
48. Suzuki, H., Yamamoto, E., Maruyama, R., Niinuma, T., and Kai, M. (2014). Biological significance of the CpG island methylator phenotype. *Biochem. Biophys. Res. Commun.* 455, 35–42.
49. Joo, Y.Y., Johnston, F.M., Zhang, D.Y., Joo, H.H., Wang, H., Pappou, E.P., Yu, T., Easwaran, H., Baylin, S., van Engeland, M., and Ahuja, N. (2014). Prognostic value of CpG island methylator phenotype among colorectal cancer patients: a systematic review and meta-analysis. *Ann. Oncol.* 25, 2314–2327.
50. Ogino, S., Noshio, K., Kirkner, G.J., Kawasaki, T., Meyerhardt, J.A., Loda, M., Giovannucci, E.L., and Fuchs, C.S. (2009). CpG island methylator phenotype, microsatellite instability, *BRAF* mutation and clinical outcome in colon cancer. *Gut* 58, 90–96.
51. Pai, R.K., Jayachandran, P., Koong, A.C., Chang, D.T., Kwok, S., Ma, L., Arber, D.A., Balise, R.R., Tubbs, R.R., Shadrach, B., and Pai, R.K. (2012). *BRAF*-mutated, microsatellite-stable adenocarcinoma of the proximal colon: an aggressive adenocarcinoma with poor survival, mucinous differentiation, and adverse morphologic features. *Am. J. Surg. Pathol.* 36, 744–752.
52. Lochhead, P., Kuchiba, A., Imamura, Y., Liao, X., Yamauchi, M., Nishihara, R., Qian, Z.R., Morikawa, T., Shen, J., Meyerhardt, J.A., et al. (2013). Microsatellite instability and *BRAF* mutation testing in colorectal cancer prognostication. *J. Natl. Cancer Inst.* 105, 1151–1156.
53. Worthley, D.L., Whitehall, V.L., Spring, K.J., and Leggett, B.A. (2007). Colorectal carcinogenesis: road maps to cancer. *World J. Gastroenterol.* 13, 3784–3791.
54. Markowitz, S.D., and Bertagnolli, M.M. (2009). Molecular origins of cancer: molecular basis of colorectal cancer. *N. Engl. J. Med.* 361, 2449–2460.
55. Andreyev, H.J., Norman, A.R., Cunningham, D., Oates, J.R., and Clarke, P.A. (1998). Kirsten ras mutations in patients with colorectal cancer: the multicenter “RASCAL” study. *J. Natl. Cancer Inst.* 90, 675–684.
56. Andreyev, H.J., Norman, A.R., Cunningham, D., Oates, J., Dix, B.R., Iacopetta, B.J., Young, J., Walsh, T., Ward, R., Hawkins, N., et al. (2001). Kirsten ras mutations in patients with colorectal cancer: the “RASCAL II” study. *Br. J. Cancer* 85, 692–696.
57. Samowitz, W.S., Curtin, K., Schaffer, D., Robertson, M., Leppert, M., and Slattery, M.L. (2000). Relationship of *Ki-ras* mutations in colon cancers to tumor location, stage, and survival: a population-based study. *Cancer Epidemiol. Biomarkers Prev.* 9, 1193–1197.
58. Ince, W.L., Jubb, A.M., Holden, S.N., Holmgren, E.B., Tobin, P., Sridhar, M., Hurwitz, H.I., Kabbinnar, F., Novotny, W.F., Hillan, K.J., and Koeppen, H. (2005). Association of *k-ras*, *b-raf*, and *p53* status with the treatment effect of bevacizumab. *J. Natl. Cancer Inst.* 97, 981–989.
59. Wang, C., van Rijnsoever, M., Grieu, F., Bydder, S., Elsaleh, H., Joseph, D., Harvey, J., and Iacopetta, B. (2003). Prognostic significance of microsatellite instability and *Ki-ras* mutation type in stage II colorectal cancer. *Oncology* 64, 259–265.
60. Rajagopalan, H., Bardelli, A., Lengauer, C., Kinzler, K.W., Vogelstein, B., and Velculescu, V.E. (2002). Tumorigenesis: *RAF/RAS* oncogenes and mismatch-repair status. *Nature* 418, 934.
61. Di Nicolantonio, F., Martini, M., Molinari, F., Sartore-Bianchi, A., Arena, S., Saletti, P., De Dosso, S., Mazzucchelli, L., Frattini, M., Siena, S., and Bardelli, A. (2008). Wild-type *BRAF* is required for response to panitumumab or cetuximab in metastatic colorectal cancer. *J. Clin. Oncol.* 26, 5705–5712.
62. Zhu, L., Dong, C., Cao, Y., Fang, X., Zhong, C., Li, D., and Yuan, Y. (2016). Prognostic role of *BRAF* mutation in stage II/III colorectal cancer receiving curative resection and adjuvant chemotherapy: a meta-analysis based on randomized clinical trials. *PLoS ONE* 11, e0154795.
63. Fariña-Sarasqueta, A., van Lijschoten, G., Moerland, E., Creemers, G.J., Lemmens, V.E.P.P., Rutten, H.J.T., and van den Brule, A.J.C. (2010). The *BRAF* V600E mutation is an independent prognostic factor for survival in stage II and stage III colon cancer patients. *Ann. Oncol.* 21, 2396–2402.
64. International Human Genome Sequencing Consortium (2004). Finishing the euchromatic sequence of the human genome. *Nature* 431, 931–945.
65. Takahashi, Y., Iwaya, T., Sawada, G., Kurashige, J., Matsumura, T., Uchi, R., Ueo, H., Takano, Y., Eguchi, H., Sudo, T., et al. (2014). Up-regulation of *NEK2* by *microRNA-128* methylation is associated with poor prognosis in colorectal cancer. *Ann. Surg. Oncol.* 21, 205–212.
66. Costa, F.F. (2005). Non-coding RNAs: new players in eukaryotic biology. *Gene* 357, 83–94.
67. He, L., and Hannon, G.J. (2004). MicroRNAs: small RNAs with a big role in gene regulation. *Nat. Rev. Genet.* 5, 522–531.
68. Mendell, J.T. (2005). MicroRNAs: critical regulators of development, cellular physiology and malignancy. *Cell Cycle* 4, 1179–1184.
69. Vasudevan, S., Tong, Y., and Steitz, J.A. (2007). Switching from repression to activation: microRNAs can up-regulate translation. *Science* 318, 1931–1934.
70. Calin, G.A., Dumitru, C.D., Shimizu, M., Bichi, R., Zupo, S., Noch, E., Aldler, H., Rattan, S., Keating, M., Rai, K., et al. (2002). Frequent deletions and down-regulation of micro-RNA genes *miR15* and *miR16* at 13q14 in chronic lymphocytic leukemia. *Proc. Natl. Acad. Sci. USA* 99, 15524–15529.
71. Slaby, O., Svoboda, M., Michalek, J., and Vyzula, R. (2009). MicroRNAs in colorectal cancer: translation of molecular biology into clinical application. *Mol. Cancer* 8, 102.
72. Slattery, M.L., Mullany, L.E., Sakoda, L.C., Wolff, R.K., Stevens, J.R., Samowitz, W.S., and Herrick, J.S. (2018). The PI3K/AKT signaling pathway: Associations of miRNAs with dysregulated gene expression in colorectal cancer. *Mol. Carcinog.* 57, 243–261.
73. Slattery, M.L., Mullany, L.E., Sakoda, L.C., Samowitz, W.S., Wolff, R.K., Stevens, J.R., and Herrick, J.S. (2017). Expression of Wnt-signaling pathway genes and their associations with miRNAs in colorectal cancer. *Oncotarget* 9, 6075–6085.
74. Cha, S.T., Tan, C.T., Chang, C.C., Chu, C.Y., Lee, W.J., Lin, B.Z., Lin, M.T., and Kuo, M.L. (2016). Retracted. *Nat. Cell Biol.* 19, 76.
75. Ji, S., Ye, G., Zhang, J., Wang, L., Wang, T., Wang, Z., Zhang, T., Wang, G., Guo, Z., Luo, Y., et al. (2013). miR-574-5p negatively regulates *Qki6/7* to impact  $\beta$ -catenin/Wnt signalling and the development of colorectal cancer. *Gut* 62, 716–726.
76. Rasmussen, M.H., Lyskjær, I., Jersie-Christensen, R.R., Tarpgaard, L.S., Primdahl-Bengtson, B., Nielsen, M.M., Pedersen, J.S., Hansen, T.P., Hansen, F., Olsen, J.V., et al. (2016). miR-625-3p regulates oxaliplatin resistance by targeting MAP2K6-p38 signalling in human colorectal adenocarcinoma cells. *Nat. Commun.* 7, 12436.
77. Ye, L., Jiang, T., Shao, H., Zhong, L., Wang, Z., Liu, Y., Tang, H., Qin, B., Zhang, X., and Fan, J. (2017). miR-1290 is a biomarker in DNA-mismatch-repair-deficient



- colon cancer and promotes resistance to 5-fluorouracil by directly targeting hMSH2. *Mol. Ther. Nucleic Acids* 7, 453–464.
78. Boussios, S., Ozturk, M.A., Moschetta, M., Karathanasi, A., Zakyntinakis-Kyriakou, N., Katsanos, K.H., Christodoulou, D.K., and Pavlidis, N. (2019). The developing story of predictive biomarkers in colorectal cancer. *J. Pers. Med.* 9, 12.
  79. Creemers, E.E., Tijssen, A.J., and Pinto, Y.M. (2012). Circulating microRNAs: novel biomarkers and extracellular communicators in cardiovascular disease? *Circ. Res.* 110, 483–495.
  80. Arroyo, J.D., Chevillet, J.R., Kroh, E.M., Ruf, I.K., Pritchard, C.C., Gibson, D.F., Mitchell, P.S., Bennett, C.F., Pogosova-Agadjanyan, E.L., Stirewalt, D.L., et al. (2011). Argonaute2 complexes carry a population of circulating microRNAs independent of vesicles in human plasma. *Proc. Natl. Acad. Sci. USA* 108, 5003–5008.
  81. Turchinovich, A., Weiz, L., Langheinz, A., and Burwinkel, B. (2011). Characterization of extracellular circulating microRNA. *Nucleic Acids Res.* 39, 7223–7233.
  82. Vickers, K.C., Palmisano, B.T., Shoucri, B.M., Shamburek, R.D., and Remaley, A.T. (2011). MicroRNAs are transported in plasma and delivered to recipient cells by high-density lipoproteins. *Nat. Cell Biol.* 13, 423–433.
  83. Valadi, H., Ekström, K., Bossios, A., Sjöstrand, M., Lee, J.J., and Lötvall, J.O. (2007). Exosome-mediated transfer of mRNAs and microRNAs is a novel mechanism of genetic exchange between cells. *Nat. Cell Biol.* 9, 654–659.
  84. Toiyama, Y., Takahashi, M., Hur, K., Nagasaka, T., Tanaka, K., Inoue, Y., Kusunoki, M., Boland, C.R., and Goel, A. (2013). Serum miR-21 as a diagnostic and prognostic biomarker in colorectal cancer. *J. Natl. Cancer Inst.* 105, 849–859.
  85. Ogata-Kawata, H., Izumiya, M., Kurioka, D., Honma, Y., Yamada, Y., Furuta, K., Gunji, T., Ohta, H., Okamoto, H., Sonoda, H., et al. (2014). Circulating exosomal microRNAs as biomarkers of colon cancer. *PLoS ONE* 9, e92921.
  86. Schetter, A.J., Leung, S.Y., Sohn, J.J., Zanetti, K.A., Bowman, E.D., Yanaihara, N., Yuen, S.T., Chan, T.L., Kwong, D.L., Au, G.K., et al. (2008). MicroRNA expression profiles associated with prognosis and therapeutic outcome in colon adenocarcinoma. *JAMA* 299, 425–436.
  87. Mima, K., Nishihara, R., Yang, J., Dou, R., Masugi, Y., Shi, Y., da Silva, A., Cao, Y., Song, M., Nowak, J., et al. (2016). MicroRNA *MIR21* (miR-21) and *PTGS2* expression in colorectal cancer and patient survival. *Clin. Cancer Res.* 22, 3841–3848.
  88. Hur, K., Toiyama, Y., Takahashi, M., Balaguer, F., Nagasaka, T., Koike, J., Hemmi, H., Koi, M., Boland, C.R., and Goel, A. (2013). MicroRNA-200c modulates epithelial-to-mesenchymal transition (EMT) in human colorectal cancer metastasis. *Gut* 62, 1315–1326.
  89. Toiyama, Y., Hur, K., Tanaka, K., Inoue, Y., Kusunoki, M., Boland, C.R., and Goel, A. (2014). Serum miR-200c is a novel prognostic and metastasis-predictive biomarker in patients with colorectal cancer. *Ann. Surg.* 259, 735–743.
  90. Takahashi, M., Sung, B., Shen, Y., Hur, K., Link, A., Boland, C.R., Aggarwal, B.B., and Goel, A. (2012). Boswellic acid exerts antitumor effects in colorectal cancer cells by modulating expression of the let-7 and miR-200 microRNA family. *Carcinogenesis* 33, 2441–2449.
  91. Li, Z., Pan, W., Shen, Y., Chen, Z., Zhang, L., Zhang, Y., Luo, Q., and Ying, X. (2018). IGF1/IGF1R and microRNA let-7e down-regulate each other and modulate proliferation and migration of colorectal cancer cells. *Cell Cycle* 17, 1212–1219.
  92. Nakajima, G., Hayashi, K., Xi, Y., Kudo, K., Uchida, K., Takasaki, K., Yamamoto, M., and Ju, J. (2006). Non-coding microRNAs hsa-let-7g and hsa-miR-181b are associated with chemoresistance to S-1 in colon cancer. *Cancer Genomics Proteomics* 3, 317–324.
  93. Pauli, A., Rinn, J.L., and Schier, A.F. (2011). Non-coding RNAs as regulators of embryogenesis. *Nat. Rev. Genet.* 12, 136–149.
  94. ENCODE Project Consortium (2012). An integrated encyclopedia of DNA elements in the human genome. *Nature* 489, 57–74.
  95. Derrien, T., Johnson, R., Bussotti, G., Tanzer, A., Djebali, S., Tilgner, H., Guernec, G., Martin, D., Merkel, A., Knowles, D.G., et al. (2012). The GENCODE v7 catalog of human long noncoding RNAs: analysis of their gene structure, evolution, and expression. *Genome Res.* 22, 1775–1789.
  96. Esteller, M. (2011). Non-coding RNAs in human disease. *Nat. Rev. Genet.* 12, 861–874.
  97. Akhade, V.S., Pal, D., and Kanduri, C. (2017). Long noncoding RNA: genome organization and mechanism of action. *Adv. Exp. Med. Biol.* 1008, 47–74.
  98. Gupta, R.A., Shah, N., Wang, K.C., Kim, J., Horlings, H.M., Wong, D.J., Tsai, M.C., Hung, T., Argani, P., Rinn, J.L., et al. (2010). Long non-coding RNA HOTAIR reprograms chromatin state to promote cancer metastasis. *Nature* 464, 1071–1076.
  99. Kogo, R., Shimamura, T., Mimori, K., Kawahara, K., Imoto, S., Sudo, T., Tanaka, F., Shibata, K., Suzuki, A., Komune, S., et al. (2011). Long noncoding RNA HOTAIR regulates polycomb-dependent chromatin modification and is associated with poor prognosis in colorectal cancers. *Cancer Res.* 71, 6320–6326.
  100. Svoboda, M., Slyskova, J., Schneiderova, M., Makovicky, P., Bielik, L., Levy, M., Lipska, L., Hemmelova, B., Kala, Z., Protivankova, M., et al. (2014). HOTAIR long non-coding RNA is a negative prognostic factor not only in primary tumors, but also in the blood of colorectal cancer patients. *Carcinogenesis* 35, 1510–1515.
  101. Wu, Z.H., Wang, X.L., Tang, H.M., Jiang, T., Chen, J., Lu, S., Qiu, G.Q., Peng, Z.H., and Yan, D.W. (2014). Long non-coding RNA HOTAIR is a powerful predictor of metastasis and poor prognosis and is associated with epithelial-mesenchymal transition in colon cancer. *Oncol. Rep.* 32, 395–402.
  102. Li, P., Zhang, X., Wang, L., Du, L., Yang, Y., Liu, T., Li, C., and Wang, C. (2017). lncRNA HOTAIR contributes to 5FU resistance through suppressing miR-218 and activating NF- $\kappa$ B/TS signaling in colorectal cancer. *Mol. Ther. Nucleic Acids* 8, 356–369.
  103. Zhang, J., Yin, M., Peng, G., and Zhao, Y. (2018). CRNDE: an important oncogenic long non-coding RNA in human cancers. *Cell Prolif.* 51, e12440.
  104. Han, P., Li, J.W., Zhang, B.M., Lv, J.C., Li, Y.M., Gu, X.Y., Yu, Z.W., Jia, Y.H., Bai, X.F., Li, L., et al. (2017). The lncRNA CRNDE promotes colorectal cancer cell proliferation and chemoresistance via miR-181a-5p-mediated regulation of Wnt/ $\beta$ -catenin signaling. *Mol. Cancer* 16, 9.
  105. Jiang, H., Wang, Y., Ai, M., Wang, H., Duan, Z., Wang, H., Zhao, L., Yu, J., Ding, Y., and Wang, S. (2017). Long noncoding RNA CRNDE stabilized by hnRNPUL2 accelerates cell proliferation and migration in colorectal carcinoma via activating Ras/MAPK signaling pathways. *Cell Death Dis.* 8, e2862.
  106. Ji, P., Diederichs, S., Wang, W., Böing, S., Metzger, R., Schneider, P.M., Tidow, N., Brandt, B., Buerger, H., Bulk, E., et al. (2003). MALAT-1, a novel noncoding RNA, and thymosin  $\beta$ 4 predict metastasis and survival in early-stage non-small cell lung cancer. *Oncogene* 22, 8031–8041.
  107. Zheng, H.T., Shi, D.B., Wang, Y.W., Li, X.X., Xu, Y., Tripathi, P., Gu, W.L., Cai, G.X., and Cai, S.J. (2014). High expression of lncRNA MALAT1 suggests a biomarker of poor prognosis in colorectal cancer. *Int. J. Clin. Exp. Pathol.* 7, 3174–3181.
  108. Takahashi, K., Yan, I.K., Haga, H., and Patel, T. (2014). Modulation of hypoxia-signaling pathways by extracellular linc-RoR. *J. Cell Sci.* 127, 1585–1594.
  109. Kogure, T., Yan, I.K., Lin, W.L., and Patel, T. (2013). Extracellular vesicle-mediated transfer of a novel long noncoding RNA TUC339: a mechanism of intercellular signaling in human hepatocellular cancer. *Genes Cancer* 4, 261–272.
  110. Liu, T., Zhang, X., Gao, S., Jing, F., Yang, Y., Du, L., Zheng, G., Li, P., Li, C., and Wang, C. (2016). Exosomal long noncoding RNA CRNDE-h as a novel serum-based biomarker for diagnosis and prognosis of colorectal cancer. *Oncotarget* 7, 85551–85563.
  111. Lei, B., Tian, Z., Fan, W., and Ni, B. (2019). Circular RNA: a novel biomarker and therapeutic target for human cancers. *Int. J. Med. Sci.* 16, 292–301.
  112. Sanger, H.L., Klotz, G., Riesner, D., Gross, H.J., and Kleinschmidt, A.K. (1976). Viroids are single-stranded covalently closed circular RNA molecules existing as highly base-paired rod-like structures. *Proc. Natl. Acad. Sci. USA* 73, 3852–3856.
  113. Zaphiropoulos, P.G. (1997). Exon skipping and circular RNA formation in transcripts of the human cytochrome P-450 2C18 gene in epidermis and of the rat androgen binding protein gene in testis. *Mol. Cell. Biol.* 17, 2985–2993.
  114. Hansen, T.B., Jensen, T.I., Clausen, B.H., Bramsen, J.B., Finsen, B., Damgaard, C.K., and Kjems, J. (2013). Natural RNA circles function as efficient microRNA sponges. *Nature* 495, 384–388.
  115. Hansen, T.B., Kjems, J., and Damgaard, C.K. (2013). Circular RNA and miR-7 in cancer. *Cancer Res.* 73, 5609–5612.

## Review

116. Weng, W., Wei, Q., Toden, S., Yoshida, K., Nagasaka, T., Fujiwara, T., Cai, S., Qin, H., Ma, Y., and Goel, A. (2017). Circular RNA ciRS-7-A promising prognostic biomarker and a potential therapeutic target in colorectal cancer. *Clin. Cancer Res.* 23, 3918–3928.
117. Zeng, K., Chen, X., Xu, M., Liu, X., Hu, X., Xu, T., Sun, H., Pan, Y., He, B., and Wang, S. (2018). circHIPK3 promotes colorectal cancer growth and metastasis by sponging miR-7. *Cell Death Dis.* 9, 417.
118. Zheng, X., Chen, L., Zhou, Y., Wang, Q., Zheng, Z., Xu, B., Wu, C., Zhou, Q., Hu, W., Wu, C., and Jiang, J. (2019). A novel protein encoded by a circular RNA circPPP1R12A promotes tumor pathogenesis and metastasis of colon cancer via Hippo-YAP signaling. *Mol. Cancer* 18, 47.
119. Lasda, E., and Parker, R. (2014). Circular RNAs: diversity of form and function. *RNA* 20, 1829–1842.
120. Vacante, M., Ciuni, R., Basile, F., and Biondi, A. (2020). The liquid biopsy in the management of colorectal cancer: an overview. *Biomedicines* 8, 308.
121. Osumi, H., Shinozaki, E., and Yamaguchi, K. (2020). Circulating tumor DNA as a novel biomarker optimizing chemotherapy for colorectal cancer. *Cancers (Basel)* 12, 1566.
122. Van Cutsem, E., Köhne, C.H., Hitre, E., Zaluski, J., Chang Chien, C.R., Makhson, A., D'Haens, G., Pintér, T., Lim, R., Bodoky, G., et al. (2009). Cetuximab and chemotherapy as initial treatment for metastatic colorectal cancer. *N. Engl. J. Med.* 360, 1408–1417.

YMTHE, Volume 29

## **Supplemental Information**

### **Novel Genetic and Epigenetic Biomarkers of Prognostic and Predictive Significance in Stage II/III Colorectal Cancer**

**Xiao-Jing Luo, Qi Zhao, Jia Liu, Jia-Bo Zheng, Miao-Zhen Qiu, Huai-Qiang Ju, and Rui-Hua Xu**

## Supplementary References:

1. Toiyama, Y., Hur, K., Tanaka, K., Inoue, Y., Kusunoki, M., and Boland, C. R., et al. (2014). Serum miR-200c Is a Novel Prognostic and Metastasis-Predictive Biomarker in Patients with Colorectal Cancer. *ANN SURG*.259, 735-743.
2. Xi, Y., Formentini, A., Chien, M., Weir, D. B., Russo, J. J., and Ju, J., et al. (2006). Prognostic Values of microRNAs in Colorectal Cancer. *Biomark Insights*.2, 113-121.
3. Wang, S., Yang, M., Wang, X., Lin, J., and Ding, Y. (2014). Increased expression of miRNA-182 in colorectal carcinoma: an independent and tissue-specific prognostic factor. *INT J CLIN EXP PATHO*.7, 3498.
4. Liu, H., Du L, Wen, Z., Yang, Y., Li, J., and Wang, L., et al. (2013). Up-regulation of miR-182 expression in colorectal cancer tissues and its prognostic value. *INT J COLORECTAL DIS*.28, 697-703.
5. Sumbul, A. T., Gogebakan, B., Bayram, S., Batmaci, C. Y., and Oztuzcu, S. (2015). MicroRNA 211 expression is upregulated and associated with poor prognosis in colorectal cancer: a case-control study. *Tumour Biol*.36, 9703-9709.
6. Pu, X. X., Huang, G. L., Guo, H. Q., Guo, C. C., Li, H., and Ye, S., et al. (2010). Circulating miR-221 directly amplified from plasma is a potential diagnostic and prognostic marker of colorectal cancer and is correlated with p53 expression. *J Gastroenterol Hepatol*.25, 1674-1680.
7. Ye, L., Jiang, T., Shao, H., Zhong, L., Wang, Z., and Liu, Y., et al. (2017). miR-1290 Is a Biomarker in DNA-Mismatch-Repair-Deficient Colon Cancer and Promotes Resistance to 5-Fluorouracil by Directly Targeting hMSH2. *Mol Ther - Nucl Acids*.7, 453-464.
8. Wang, L., and Gu, J. (2012). Serum microRNA-29a is a promising novel marker for early detection of colorectal liver metastasis. *CANCER EPIDEMIOLOG*.36, e61-e67.
9. Zhang, H., Li, P., Ju, H., Pesta, M., Kulda, V., and Jin, W., et al. (2014). Diagnostic and prognostic value of microRNA-21 in colorectal cancer: an original study and individual participant data meta-analysis. *Cancer Epidemiol Biomarkers Prev*.23, 2783-2792.
10. Schetter, A. J., Leung, S. Y., Sohn, J. J., Zanetti, K. A., Bowman, E. D., and Yanaihara, N., et al. (2008). MicroRNA expression profiles associated with prognosis and therapeutic outcome in colon adenocarcinoma. *JAMA*.299, 425-436.
11. Toiyama, Y., Takahashi, M., Hur, K., Nagasaka, T., Tanaka, K., and Inoue, Y., et al. (2013). Serum miR-21 as a Diagnostic and Prognostic Biomarker in Colorectal Cancer. *JNCI: J Natl Cancer I*.105, 849-859.
12. Tsukamoto, M., Iinuma, H., Yagi, T., Matsuda, K., and Hashiguchi, Y. (2017). Circulating Exosomal MicroRNA-21 as a Biomarker in Each Tumor Stage of Colorectal Cancer. *Oncology*.92, 360-370.
13. Fukushima, Y., Iinuma, H., Tsukamoto, M., Matsuda, K., and Hashiguchi, Y. (2015). Clinical significance of microRNA-21 as a biomarker in each Dukes' stage of colorectal cancer. *ONCOL REP*.33, 573-582.
14. Bahnassy, A. A., Salem, S. E., El-Sayed, M., Khorshid, O., Abdellateif, M. S., and Youssef, A. S., et al. (2018). MiRNAs as molecular biomarkers in stage II egyptian colorectal cancer patients. *EXP MOL PATHOL*.105, 260-271.
15. Cheng, H., Zhang, L., Cogdell, D. E., Zheng, H., Schetter, A. J., and Nykter, M., et al. (2011). Circulating plasma MiR-141 is a novel biomarker for metastatic colon cancer and predicts poor prognosis. *PLOS ONE*.6, e17745.



16. Díaz, R., Silva, J., García, J. M., Lorenzo, Y., García, V., and Peña, C., et al. (2008). Deregulated expression of miR-106a predicts survival in human colon cancer patients. *Gene Chromosome Canc.* *47*, 794-802.
17. Zhang, G. J., Li, J. S., Zhou, H., Xiao, H. X., Li, Y., and Zhou, T. (2015). MicroRNA-106b promotes colorectal cancer cell migration and invasion by directly targeting DLC1. *J Exp Clin Cancer Res.* *34*, 73.
18. Motoyama, K., Inoue, H., Takatsuno, Y., Tanaka, F., Mimori, K., and Uetake, H., et al. (2009). Over- and under-expressed microRNAs in human colorectal cancer. *INT J ONCOL.* *34*, 1069-1075.
19. Caritg, O., Navarro, A., Moreno, I., Martinez-Rodenas, F., Cordeiro, A., and Munoz, C., et al. (2016). Identifying High-Risk Stage II Colon Cancer Patients: A Three-MicroRNA-Based Score as a Prognostic Biomarker. *Clin Colorectal Canc.* *15*, e175-e182.
20. Zhou, T., Zhang, G. J., Zhou, H., Xiao, H. X., and Li, Y. (2014). Overexpression of microRNA-183 in human colorectal cancer and its clinical significance. *Eur J Gastroenterol Hepatol.* *26*, 229-233.
21. Yuan, D., Li, K., Zhu, K., Yan, R., and Dang, C. (2015). Plasma miR-183 predicts recurrence and prognosis in patients with colorectal cancer. *CANCER BIOL THER.* *16*, 268-275.
22. Yuan, Z., Baker, K., Redman, M. W., Wang, L., Adams, S. V., and Yu, M., et al. (2017). Dynamic plasma microRNAs are biomarkers for prognosis and early detection of recurrence in colorectal cancer. *Br J Cancer.* *117*, 1202-1210.
23. Maiertaler, M., Benner, A., Hoffmeister, M., Surowy, H., Jansen, L., and Knebel, P., et al. (2017). Plasma miR-122 and miR-200 family are prognostic markers in colorectal cancer. *INT J CANCER.* *140*, 176-187.
24. Rapti, S., Kontos, C. K., Papadopoulos, I. N., and Scorilas, A. (2016). High miR-96 levels in colorectal adenocarcinoma predict poor prognosis, particularly in patients without distant metastasis at the time of initial diagnosis. *Tumor Biol.* *37*, 11815-11824.
25. Wan, D., He, S., Xie, B., Xu, G., Gu, W., and Shen, C., et al. (2013). Aberrant expression of miR-199a-3p and its clinical significance in colorectal cancers. *MED ONCOL.* *30*, 378.
26. Wang, B., Shen, Z. L., Jiang, K. W., Zhao, G., Wang, C. Y., and Yan, Y. C., et al. (2015). MicroRNA-217 functions as a prognosis predictor and inhibits colorectal cancer cell proliferation and invasion via an AEG-1 dependent mechanism. *BMC CANCER.* *15*, 437.
27. Ma, Y., Zhang, P., Wang, F., Zhang, H., Yang, J., and Peng, J., et al. (2012). miR-150 as a potential biomarker associated with prognosis and therapeutic outcome in colorectal cancer. *GUT.* *61*, 1447-1453.
28. Hur, K., Toiyama, Y., Okugawa, Y., Ide, S., Imaoka, H., and Boland, C. R., et al. (2017). Circulating microRNA-203 predicts prognosis and metastasis in human colorectal cancer. *GUT.* *66*, 654-665.
29. Ye, H., Hao, H., Wang, J., Chen, R., and Huang, Z. (2017). miR-203 as a novel biomarker for the diagnosis and prognosis of colorectal cancer: a systematic review and meta-analysis. *Onco Targets Ther.* *10*, 3685-3696.
30. Lin, M., Duan, B., Hu, J., Yu, H., Sheng, H., and Gao, H., et al. (2017). Decreased expression of miR-193a-3p is associated with poor prognosis in colorectal cancer. *ONCOL LETT.* *14*, 1061-1067.
31. Zhang, P., Ji, D. B., Han, H. B., Shi, Y. F., Du CZ, and Gu, J. (2014). Downregulation of miR-193a-5p correlates with lymph node metastasis and poor prognosis in colorectal cancer. *World J Gastroenterol.* *20*, 12241-12248.
32. Wang, L. L., Du LT, Li, J., Liu, Y. M., Qu, A. L., and Yang, Y. M., et al. (2014). Decreased expression of miR-133a correlates with poor prognosis in colorectal cancer patients. *World J Gastroenterol.* *20*, 11340-11346.
33. Yu, H., Gao, G., Jiang, L., Guo, L., Lin, M., and Jiao, X., et al. (2013). Decreased expression of

miR-218 is associated with poor prognosis in patients with colorectal cancer. *INT J CLIN EXP PATHO*.6, 2904.

34. Sun, P., Sun, D., Wang, X., Liu, T., Ma, Z., and Duan, L. (2015). miR-206 is an independent prognostic factor and inhibits tumor invasion and migration in colorectal cancer. *CANCER BIOMARK*.15, 391-396.

35. Suto, T., Yokobori, T., Yajima, R., Morita, H., Fujii, T., and Yamaguchi, S., et al. (2015). MicroRNA-7 expression in colorectal cancer is associated with poor prognosis and regulates cetuximab sensitivity via EGFR regulation. *CARCINOGENESIS*.36, 338-345.

36. Nagano, Y., Toiyama, Y., Okugawa, Y., Imaoka, H., Fujikawa, H., and Yasuda, H., et al. (2016). MicroRNA-7 Is Associated with Malignant Potential and Poor Prognosis in Human Colorectal Cancer. *ANTICANCER RES*.36, 6521-6526.

37. Sun, M., Song, H., Wang, S., Zhang, C., Zheng, L., and Chen, F., et al. (2017). Integrated analysis identifies microRNA-195 as a suppressor of Hippo-YAP pathway in colorectal cancer. *J HEMATOL ONCOL*.10, 79.

38. Zhang, Y., Lin, C., Liao, G., Liu, S., Ding, J., and Tang, F., et al. (2015). MicroRNA-506 suppresses tumor proliferation and metastasis in colon cancer by directly targeting the oncogene EZH2. *Oncotarget*.6, 32586-32601.

39. Zhang, G., Xia, S., Tian, H., Liu, Z., and Zhou, T. (2012). Clinical significance of miR-22 expression in patients with colorectal cancer. *MED ONCOL*.29, 3108-3112.

40. Xu, X. H., Wu, X. B., Wu, S. B., Liu, H. B., Chen, R., and Li, Y. (2014). Identification of miRNAs differentially expressed in clinical stages of human colorectal carcinoma-an investigation in Guangzhou, China. *PLOS ONE*.9, e94060.

41. Xiao, Z. G., Deng, Z. S., Zhang, Y. D., Zhang, Y., and Huang, Z. C. (2013). Clinical significance of microRNA-93 downregulation in human colon cancer. *Eur J Gastroenterol Hepatol*.25, 296-301.

42. Takahashi, M., Cuatrecasas, M., Balaguer, F., Hur, K., Toiyama, Y., and Castells, A., et al. (2012). The clinical significance of MiR-148a as a predictive biomarker in patients with advanced colorectal cancer. *PLOS ONE*.7, e46684.

43. Ling, H., Pickard, K., Ivan, C., Isella, C., Ikuo, M., and Mitter, R., et al. (2016). The clinical and biological significance of MIR-224 expression in colorectal cancer metastasis. *GUT*.65, 977-989.

44. Liao, W. T., Li, T. T., Wang, Z. G., Wang, S. Y., He, M. R., and Ye, Y. P., et al. (2013). microRNA-224 Promotes Cell Proliferation and Tumor Growth in Human Colorectal Cancer by Repressing PHLPP1 and PHLPP2. *CLIN CANCER RES*.19, 4662-4672.

45. Perez-Carbonell, L., Sinicrope, F. A., Alberts, S. R., Oberg, A. L., Balaguer, F., and Castells, A., et al. (2015). MiR-320e is a novel prognostic biomarker in colorectal cancer. *BRIT J CANCER*.113, 83-90.

46. Li, J., Du, L., Yang, Y., Wang, C., Liu, H., and Wang, L., et al. (2013). MiR-429 is an independent prognostic factor in colorectal cancer and exerts its anti-apoptotic function by targeting SOX2. *CANCER LETT*.329, 84-90.

47. Miyoshi, J., Toden, S., Yoshida, K., Toiyama, Y., Alberts, S. R., and Kusunoki, M., et al. (2017). MiR-139-5p as a novel serum biomarker for recurrence and metastasis in colorectal cancer. *SCI REP-UK*.7.

48. Kerimis, D., Kontos, C. K., Christodoulou, S., Papadopoulos, I. N., and Scorilas, A. (2017). Elevated expression of miR-24-3p is a potentially adverse prognostic factor in colorectal adenocarcinoma. *CLIN BIOCHEM*.50, 285-292.

49. Wang, W., Qu, A., Liu, W., Liu, Y., Zheng, G., and Du, L., et al. (2017). Circulating miR-210 as a diagnostic and prognostic biomarker for colorectal cancer. *EUR J CANCER CARE*.26, e12448.
50. Qian, J., Jiang, B., Li, M., Chen, J., and Fang, M. (2013). Prognostic Significance of MicroRNA-16 Expression in Human Colorectal Cancer. *WORLD J SURG*.37, 2944-2949.
51. Zhou, T., Zhang, G., Liu, Z., Xia, S., and Tian, H. (2013). Overexpression of miR-92a correlates with tumor metastasis and poor prognosis in patients with colorectal cancer. *INT J COLORECTAL DIS*.28, 19-24.
52. Gao, J., Li, N., Dong, Y., Li, S., Xu, L., and Li, X., et al. (2015). miR-34a-5p suppresses colorectal cancer metastasis and predicts recurrence in patients with stage II/III colorectal cancer. *ONCOGENE*.34, 4142-4152.
53. Wang, F., Ni, H., Sun, F., Li, M., and Chen, L. (2016). Overexpression of lncRNA AFAP1-AS1 correlates with poor prognosis and promotes tumorigenesis in colorectal cancer. *BIOMED PHARMACOTHER*.81, 152-159.
54. Ren, Y. K., Xiao, Y., Wan, X. B., Zhao, Y. Z., Li, J., and Li, Y., et al. (2015). Association of long non-coding RNA HOTTIP with progression and prognosis in colorectal cancer. *Int J Clin Exp Pathol*.8, 11458-11463.
55. Tao, K., Yang, J., Hu, Y., Sun, Y., Tan, Z., and Duan, J., et al. (2015). Clinical significance of urothelial carcinoma associated 1 in colon cancer. *INT J CLIN EXP MED*.8, 21854-21860.
56. Hong Jiang, Y. C. X. F. (2016). Tissue expression level of lncRNA UCA1 is a prognostic biomarker for colorectal cancer. *Int J Clin Exp Pathol*.4, 4241-4246.
57. Bian, Z., Jin, L., Zhang, J., Yin, Y., Quan, C., and Hu, Y., et al. (2016). LncRNA-UCA1 enhances cell proliferation and 5-fluorouracil resistance in colorectal cancer by inhibiting miR-204-5p. *Sci Rep*.6, 23892.
58. Han, Y., Yang, Y., Yuan, H., Zhang, T., Sui, H., and Wei, X., et al. (2014). UCA1, a long non-coding RNA up-regulated in colorectal cancer influences cell proliferation, apoptosis and cell cycle distribution. *PATHOLOGY*.46, 396-401.
59. Ni, B., Yu, X., Guo, X., Fan, X., Yang, Z., and Wu, P., et al. (2015). Increased urothelial cancer associated 1 is associated with tumor proliferation and metastasis and predicts poor prognosis in colorectal cancer. *INT J ONCOL*.47, 1329-1338.
60. Su, J., Zhang, E., Han, L., Yin, D., Liu, Z., and He, X., et al. (2017). Long noncoding RNA BLACAT1 indicates a poor prognosis of colorectal cancer and affects cell proliferation by epigenetically silencing of p15. *CELL DEATH DIS*.8, e2665.
61. Gao, X., Wen, J., Gao, P., Zhang, G., and Zhang, G. (2017). Overexpression of the long non-coding RNA, linc-UBC1, is associated with poor prognosis and facilitates cell proliferation, migration, and invasion in colorectal cancer. *Oncotargets Ther*.10, 1017-1026.
62. Ma, Y., Yang, Y., Wang, F., Moyer, M., Wei, Q., and Zhang, P., et al. (2016). Long non-coding RNA CCAL regulates colorectal cancer progression by activating Wnt/ $\beta$ -catenin signalling pathway via suppression of activator protein 2  $\alpha$ . *GUT*.65, 1494-1504.
63. McClelland, M. L., Mesh, K., Lorenzana, E., Chopra, V. S., Segal, E., and Watanabe, C., et al. (2016). CCAT1 is an enhancer-templated RNA that predicts BET sensitivity in colorectal cancer. *J CLIN INVEST*.126, 639-652.
64. He, X., Tan, X., Wang, X., Jin, H., Liu, L., and Ma, L., et al. (2014). C-Myc-activated long noncoding RNA CCAT1 promotes colon cancer cell proliferation and invasion. *Tumor Biology*.35, 12181-12188.

65. Zheng, H., Shi, D., Wang, Y., Li, X., Xu, Y., and Tripathi, P., et al. (2014). High expression of lncRNA MALAT1 suggests a biomarker of poor prognosis in colorectal cancer. *INT J CLIN EXP PATHO.*7, 3174.
66. Guo, X., Hua, Z., Li, C., Peng, L., Wang, J., and Wang, B., et al. (2015). Biological significance of long non-coding RNA FTX expression in human colorectal cancer. *INT J CLIN EXP MED.*8, 15591.
67. Wang, W., and Xing, C. (2016). Upregulation of long noncoding RNA ZFAS1 predicts poor prognosis and prompts invasion and metastasis in colorectal cancer. *PATHOL RES PRACT.*212, 690-695.
68. Han, D., Gao, X., Wang, M., Qiao, Y., Xu, Y., and Yang, J., et al. (2016). Long noncoding RNA H19 indicates a poor prognosis of colorectal cancer and promotes tumor growth by recruiting and binding to eIF4A3. *Oncotarget.*7, 22159-22173.
69. Kogo, R., Shimamura, T., Mimori, K., Kawahara, K., Imoto, S., and Sudo, T., et al. (2011). Long Noncoding RNA HOTAIR Regulates Polycomb-Dependent Chromatin Modification and Is Associated with Poor Prognosis in Colorectal Cancers. *CANCER RES.*71, 6320-6326.
70. Wu, Z. H., Wang, X. L., Tang, H. M., Jiang, T., Chen, J., and Lu, S., et al. (2014). Long non-coding RNA HOTAIR is a powerful predictor of metastasis and poor prognosis and is associated with epithelial-mesenchymal transition in colon cancer. *ONCOL REP.*32, 395-402.
71. Svoboda, M., Slyskova, J., Schneiderova, M., Makovicky, P., Bielik, L., and Levy, M., et al. (2014). HOTAIR long non-coding RNA is a negative prognostic factor not only in primary tumors, but also in the blood of colorectal cancer patients. *CARCINOGENESIS.*35, 1510-1515.
72. Sun, J., Ding, C., Yang, Z., Liu, T., Zhang, X., and Zhao, C., et al. (2016). The long non-coding RNA TUG1 indicates a poor prognosis for colorectal cancer and promotes metastasis by affecting epithelial-mesenchymal transition. *J TRANSL MED.*14.
73. Yang, X., Huang, C., Peng, C., Hou, J., and Liu, J. (2016). Long noncoding RNA HULC promotes colorectal carcinoma progression through epigenetically repressing NKD2 expression. *GENE.*592, 172-178.
74. Ge, X., Chen, Y., Liao, X., Liu, D., Li, F., and Ruan, H., et al. (2013). Overexpression of long noncoding RNA PCAT-1 is a novel biomarker of poor prognosis in patients with colorectal cancer. *MED ONCOL.*30, 588.
75. Deng, Q., He, B., Gao, T., Pan, Y., Sun, H., and Xu, Y., et al. (2014). Up-regulation of 91H promotes tumor metastasis and predicts poor prognosis for patients with colorectal cancer. *PLOS ONE.*9, e103022.
76. Takahashi, Y., Sawada, G., Kurashige, J., Uchi, R., Matsumura, T., and Ueo, H., et al. (2014). Amplification of PVT-1 is involved in poor prognosis via apoptosis inhibition in colorectal cancers. *Br J Cancer.*110, 164-171.
77. Sun, Y., Zheng, Z. P., Li, H., Zhang, H. Q., and Ma, F. Q. (2016). ANRIL is associated with the survival rate of patients with colorectal cancer and affects cell migration and invasion in vitro. *MOL MED REP.*14, 1714-1720.
78. Liu, Y., Zhang, M., Liang, L., Li, J., and Chen, Y. (2015). Over-expression of lncRNA DANCR is associated with advanced tumor progression and poor prognosis in patients with colorectal cancer. *INT J CLIN EXP PATHO.*8, 11480.
79. Peng, W., Wang, Z., and Fan, H. (2017). LncRNA NEAT1 Impacts Cell Proliferation and Apoptosis of Colorectal Cancer via Regulation of Akt Signaling. *PATHOL ONCOL RES.*23, 651-656.
80. Li, Y., Li, Y., Chen, W., He, F., Tan, Z., and Zheng, J., et al. (2015). NEAT expression is associated



with tumor recurrence and unfavorable prognosis in colorectal cancer. *Oncotarget*.6, 27641-27650.

81. Wu, Y., Yang, L., Zhao, J., Li, C., Nie, J., and Liu, F., et al. (2015). Nuclear-enriched abundant transcript 1 as a diagnostic and prognostic biomarker in colorectal cancer. *MOL CANCER*.14, 191.

82. Lu, M., Liu, Z., Li, B., Wang, G., Li, D., and Zhu, Y. (2017). The high expression of long non-coding RNA PANDAR indicates a poor prognosis for colorectal cancer and promotes metastasis by EMT pathway. *J Cancer Res Clin Oncol*.143, 71-81.

83. Chen, N., Guo, D., Xu, Q., Yang, M., Wang, D., and Peng, M., et al. (2016). Long non-coding RNA FEZF1-AS1 facilitates cell proliferation and migration in colorectal carcinoma. *Oncotarget*.7, 11271-11283.

84. Liu, T., Zhang, X., Yang, Y. M., Du LT, and Wang, C. X. (2016). Increased expression of the long noncoding RNA CRNDE-h indicates a poor prognosis in colorectal cancer and is positively correlated with IRX5 mRNA expression. *Onco Targets Ther*.9, 1437-1448.

85. Jiang, H., Wang, Y., Ai, M., Wang, H., Duan, Z., and Wang, H., et al. (2017). Long noncoding RNA CRNDE stabilized by hnRNPUL2 accelerates cell proliferation and migration in colorectal carcinoma via activating Ras/MAPK signaling pathways. *Cell Death Dis*.8, e2862.

86. Liu, T., Zhang, X., Gao, S., Jing, F., Yang, Y., and Du L, et al. (2016). Exosomal long noncoding RNA CRNDE-h as a novel serum-based biomarker for diagnosis and prognosis of colorectal cancer. *Oncotarget*.7, 85551-85563.

87. Han, P., Li, J., Zhang, B., Lv, J., Li, Y., and Gu, X., et al. (2017). The lncRNA CRNDE promotes colorectal cancer cell proliferation and chemoresistance via miR-181a-5p-mediated regulation of Wnt/ $\beta$ -catenin signaling. *MOL CANCER*.16.

88. Sun, X., Hu, Y., Zhang, L., Hu, C., Guo, G., and Mao, C., et al. (2016). Mining, Validation, and Clinical Significance of Colorectal Cancer (CRC)-Associated lncRNAs. *PLOS ONE*.11, e164590.

89. Yang, P., Chen, T., Xu, Z., Zhu, H., Wang, J., and He, Z. (2016). Long noncoding RNA GAPLINC promotes invasion in colorectal cancer by targeting SNAI2 through binding with PSF and NONO. *Oncotarget*.7, 42183-42194.

90. Wang, J. Z., Xu, C. L., Wu, H., and Shen, S. J. (2017). LncRNA SNHG12 promotes cell growth and inhibits cell apoptosis in colorectal cancer cells. *BRAZ J MED BIOL RES*.50, e6079.

91. Li, C., Zhou, L., He, J., Fang, X. Q., Zhu, S. W., and Xiong, M. M. (2016). Increased long noncoding RNA SNHG20 predicts poor prognosis in colorectal cancer. *BMC CANCER*.16, 655.

92. Huang, W., Tian, Y., Dong, S., Cha, Y., Li, J., and Guo, X., et al. (2017). The long non-coding RNA SNHG3 functions as a competing endogenous RNA to promote malignant development of colorectal cancer. *ONCOL REP*.38, 1402-1410.

93. Yue, B., Qiu, S., Zhao, S., Liu, C., Zhang, D., and Yu, F., et al. (2016). LncRNA-ATB mediated E-cadherin repression promotes the progression of colon cancer and predicts poor prognosis. *J Gastroenterol Hepatol*.31, 595-603.

94. Iguchi, T., Uchi, R., Nambara, S., Saito, T., Komatsu, H., and Hirata, H., et al. (2015). A long noncoding RNA, lncRNA-ATB, is involved in the progression and prognosis of colorectal cancer. *ANTICANCER RES*.35, 1385.

95. Peng Yang, Q. R. Z. X. (2016). Original Article Long non-coding RNA AK021444 correlates with poor prognosis and promotes cell proliferation in colorectal cancer. *Int J Clin Exp Med*.2, 3033-3040.

96. Wang, Y., Cao, D., Ding, Q., Yu, W., and Gao, M. (2016). Long noncoding RNA SPRY4-IT1 promotes malignant development of colorectal cancer by targeting epithelial mesenchymal transition. *Onco Targets Ther*. Volume 9, 5417-5425.

97. Ye, L. C., Ren, L., Qiu, J. J., Zhu, D. X., Chen, T., and Chang, W. J., et al. (2015). Aberrant expression of long noncoding RNAs in colorectal cancer with liver metastasis. *Tumour Biol.*36, 8747-8754.
98. Wang, R., Du L, Yang, X., Jiang, X., Duan, W., and Yan, S., et al. (2016). Identification of long noncoding RNAs as potential novel diagnosis and prognosis biomarkers in colorectal cancer. *J Cancer Res Clin Oncol.*142, 2291-2301.
99. Jian Kang, Z. L. F. K. (2017). Original Article Overexpression of lncRNA AOC4P indicates a poor prognosis for colorectal cancer and regulates cell metastasis by epithelial mesenchymal transition. *Int J Clin Exp Pathol.*2, 1840-1846.
100. Qi, P., Xu, M. D., Ni, S. J., Huang, D., Wei, P., and Tan, C., et al. (2013). Low expression of LOC285194 is associated with poor prognosis in colorectal cancer. *J TRANSL MED.*11, 122.
101. Xu, J., Zhang, R., and Zhao, J. (2017). The Novel Long Noncoding RNA TUSC7 Inhibits Proliferation by Sponging MiR-211 in Colorectal Cancer. *CELL PHYSIOL BIOCHEM.*41, 635-644.
102. Yin, D., He, X., Zhang, E., Kong, R., De, W., and Zhang, Z. (2014). Long noncoding RNA GAS5 affects cell proliferation and predicts a poor prognosis in patients with colorectal cancer. *MED ONCOL.*31.
103. Yin, D., Liu, Z., Zhang, E., Kong, R., Zhang, Z., and Guo, R. (2015). Decreased expression of long noncoding RNA MEG3 affects cell proliferation and predicts a poor prognosis in patients with colorectal cancer. *Tumor Biol.*36, 4851-4859.
104. Huang, G., Wu, X., Li, S., Xu, X., Zhu, H., and Chen, X. (2016). The long noncoding RNA CASC2 functions as a competing endogenous RNA by sponging miR-18a in colorectal cancer. *SCI REP-UK.*6.
105. Yuan, Z., Yu, X., Ni, B., Chen, D., Yang, Z., and Huang, J., et al. (2016). Overexpression of long non-coding RNA-CTD903 inhibits colorectal cancer invasion and migration by repressing Wnt/beta-catenin signaling and predicts favorable prognosis. *INT J ONCOL.*48, 2675-2685.
106. Yang, L., Wei, H., and Xiao, H. (2016). Long non-coding RNA Loc554202 expression as a prognostic factor in patients with colorectal cancer. *EUR REV MED PHARMACO.*20, 4243.
107. Kong, J., Sun, W., Li, C., Wan, L., Wang, S., and Wu, Y., et al. (2016). Long non-coding RNA LINC01133 inhibits epithelial - mesenchymal transition and metastasis in colorectal cancer by interacting with SRSF6. *CANCER LETT.*380, 476-484.
108. Shi, D., Zheng, H., Zhuo, C., Peng, J., Li, D., and Xu, Y., et al. (2014). Low expression of novel lncRNA RP11-462C24.1 suggests a biomarker of poor prognosis in colorectal cancer. *MED ONCOL.*31, 31.
109. Qi, P., Xu, M. D., Ni, S. J., Shen, X. H., Wei, P., and Huang, D., et al. (2015). Down-regulation of ncRAN, a long non-coding RNA, contributes to colorectal cancer cell migration and invasion and predicts poor overall survival for colorectal cancer patients. *Mol Carcinog.*54, 742-750.
110. Qiu, J., and Yan, J. (2015). Long non-coding RNA LINC01296 is a potential prognostic biomarker in patients with colorectal cancer. *Tumor Biol.*36, 7175-7183.
111. Vickers, M. M., Bar, J., Gorn-Hondermann, I., Yarom, N., Daneshmand, M., and Hanson, J. E., et al. (2012). Stage-dependent differential expression of microRNAs in colorectal cancer: potential role as markers of metastatic disease. *Clin Exp Metastasis.*29, 123-132.
112. Zhang, J. X., Song, W., Chen, Z. H., Wei, J. H., Liao, Y. J., and Lei, J., et al. (2013). Prognostic and predictive value of a microRNA signature in stage II colon cancer: a microRNA expression analysis. *LANCET ONCOL.*14, 1295-1306.
113. Bobowicz, M., Skrzypski, M., Czapiewski, P., Marczyk, M., Maciejewska, A., and Jankowski, M.,

et al. (2016). Prognostic value of 5-microRNA based signature in T2-T3N0 colon cancer. *CLIN EXP METASTAS*.33, 765-773.

114. Xu, M., Kuang, Y., Wang, M., Han, X., and Yang, Q. (2017). A microRNA expression signature as a predictor of survival for colon adenocarcinoma. *NEOPLASMA*.64, 56-64.

115. Ozawa, T., Kandimalla, R., Gao, F., Nozawa, H., Hata, K., and Nagata, H., et al. (2018). A MicroRNA Signature Associated with Metastasis of T1 Colorectal Cancers to Lymph Nodes. *GASTROENTEROLOGY*.154, 844-848.

116. Zeng, J. H., Liang, L., He, R. Q., Tang, R. X., Cai, X. Y., and Chen, J. Q., et al. (2017). Comprehensive investigation of a novel differentially expressed lncRNA expression profile signature to assess the survival of patients with colorectal adenocarcinoma. *Oncotarget*.8, 16811-16828.

117. Hu, Y., Chen, H. Y., Yu, C. Y., Xu, J., Wang, J. L., and Qian, J., et al. (2014). A long non-coding RNA signature to improve prognosis prediction of colorectal cancer. *Oncotarget*.5, 2230-2242.

118. Wang, Y. L., Shao, J., Wu, X., Li, T., Xu, M., and Shi, D. (2018). A long non-coding RNA signature for predicting survival in patients with colorectal cancer. *Oncotarget*.9, 21687-21695.

119. Ju, H. Q., Zhao, Q., Wang, F., Lan, P., Wang, Z., and Zuo, Z. X., et al. (2019). A circRNA signature predicts postoperative recurrence in stage II/III colon cancer. *EMBO MOL MED*.11, e10168.
